# Supplementary material for: Insecticide Resistance of Cimex lectularius L. Populations and the Performance of Selected Neonicotinoid-Pyrethroid Mixture Sprays and an Inorganic Dust
Source: MDPI journal article supplement (doi:10.3390/insects14020133), 2023-01-27
Supplement: s1 [file s1]

## Supplementary Materials

**Table S1.** Information about field-collected *C. lectularius* populations.

| Population       | Collection site   | Year of Collection |
|------------------|-------------------|--------------------|
| Fort Dix         | Ft. Dix, NJ       | 1973               |
| Aberdeen         | Aberdeen, NJ      | 2018               |
| Bayonne          | Bayonne, NJ       | 2009               |
| Bayonne 2015     | Bayonne, NJ       | 2015               |
| Canfield         | Paterson, NJ      | 2018               |
| Cotton           | Paterson, NJ      | 2018               |
| Dehart           | Elizabeth, NJ     | 2011               |
| Hackensack       | Hackensack, NJ    | 2013               |
| Irvington 624-5G | Irvington, NJ     | 2013               |
| Irvington        | Irvington, NJ     | 2012               |
| Indy             | Indianapolis, IN  | 2008               |
| Linden 2019      | Linden, NJ        | 2019               |
| Masiello         | Paterson, NJ      | 2016               |
| New Brunswick    | New Brunswick, NJ | 2021               |

**Table S2.** Information about formulated insecticide products

| Trade Name    | Formulation                | Active ingredients                                   | Manufacturer                                              |
|---------------|----------------------------|------------------------------------------------------|-----------------------------------------------------------|
| Transport GHP | Suspension concentrate     | 22.73% acetamiprid,<br>27.27% bifenthrin             | FMC Corporation, Philadelphia, PA,<br>USA                 |
| Temprid SC    | Suspension concentrate     | 21.00% imidacloprid,<br>10.50% $\beta$ -cyfluthrin   | Bayer Crop Science LP, Research<br>Triangle Park, NC, USA |
| Tandem        | Emulsifiable concentration | 11.60% thiamethoxam,<br>3.50% $\lambda$ -cyhalothrin | Syngenta Crop Protection, Greensboro,<br>NC, USA          |
| CimeXa        | Dust                       | 92.1% amorphous silica                               | Rockwell Labs Ltd, North Kansas, MO,<br>USA               |
